# Supplementary material
Source: publisher site journal article supplement (https://www.dovepress.com/article/600123)
Supplement: Supplementary file 1 [file 600123%20Supplementary%20Material.docx]

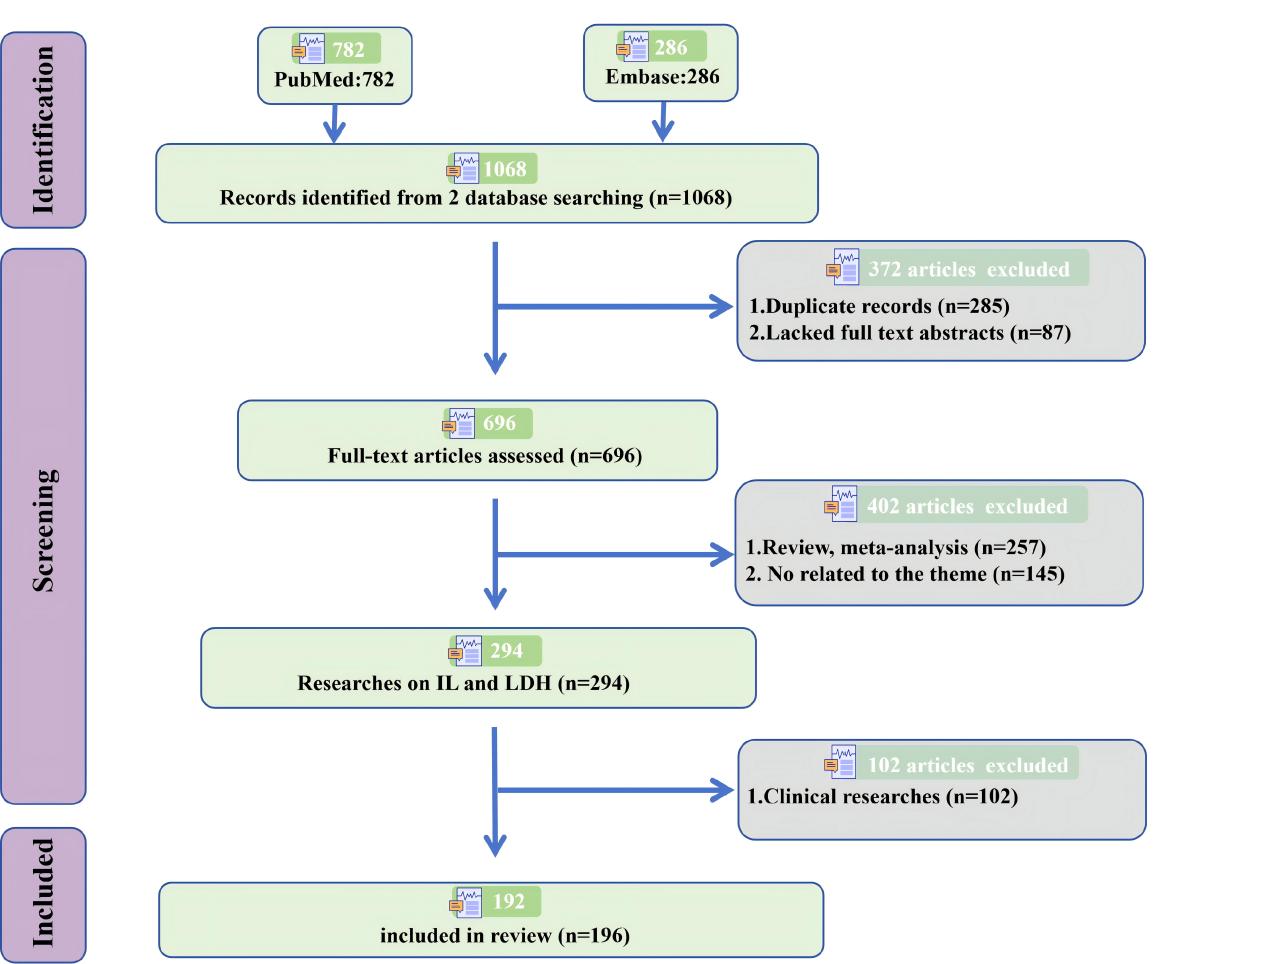
 **Supplementary Figure 1. Flow chart of the search strategy and process.** We retrieved 1068 references from the Endonte and EMBase databases, of which 285 were duplicates, 87 did not have full-text abstracts, 145 were unrelated to lumbar disc herniation (LDH) and interleukin (IL), 257 were review articles or meta-analyses, and 102 were clinical studies. Finally, a total of 196 full-text original research papers related to the research topic were included in the analysis.
